# Supplementary material for: Engaging with Artificial Intelligence (AI) with a Bottom-Up Approach for the Purpose of Sustainability: Victorian Farmers Market Association, Melbourne Australia
Source: MDPI journal article supplement (doi:10.3390/su13169314), 2021-08-19
Supplement: s1 [file s1]

**Supplementary Material – SM2 – List of 17 AI-powered solutions discovered then evaluated during the AI for VFMA design process**

|   | AI tool                                                                                                     |                                                                                                                                                                                 |                                                                                                                                                                        |
|---|-------------------------------------------------------------------------------------------------------------|---------------------------------------------------------------------------------------------------------------------------------------------------------------------------------|------------------------------------------------------------------------------------------------------------------------------------------------------------------------|
|   | Type                                                                                                        | Description                                                                                                                                                                     | Data created                                                                                                                                                           |
| 1 | AI microscope                                                                                               | Ability to detect pest                                                                                                                                                          | Images and classification of pest types earlier than if done with the human eye only                                                                                   |
| 2 | AI microscope                                                                                               | Ability to detect nutrient deficiency                                                                                                                                           | Images and classification of nutrient deficiency earlier than if done with the human eye only                                                                          |
| 3 | Refractometer application                                                                                   | Ability to obtain a BRIX rating for vegetables and fruits                                                                                                                       | BRIX number with a value of 1 to x. Depending on the crop type, the number will classify the vegetables and fruits to a Low, Medium or High level of nutrient density. |
| 4 | Spectrometer + AI image recognition (Possible with DigitAG company, AI microscope, Machine Learning expert) | Could test the ability to link spectrometer reading to visual features to make the use of a simple mobile phone as a possible assessment tool both for producers and consumers. | Images and classification of vegetables and fruits along a rating scale based on BRIX equivalent                                                                       |
| 5 | Digital Agriculture Services Platform                                                                       | Climate change risks assessment                                                                                                                                                 | Property-customised report on climate risks including flood, fire, drought, etc.                                                                                       |
| 6 | Digital Agriculture Services Platform                                                                       | Elevation, rainfall, frost data average                                                                                                                                         | Property-customised report on the property base information updated every 17 days                                                                                      |
| 7 | DigitAG company                                                                                             | Predictive analytics and insights for vineyards                                                                                                                                 | Pruning analysis and measurements, growth and predictive growth analysis, soil analysis                                                                                |
| 8 | DigitAG company                                                                                             | Predictive analytics and insights for other crops - TBD                                                                                                                         | Possibility to identify berry ripeness with image classification. Also count of apples for thinning.                                                                   |

|    |                                   |                                                                                                                                                                                                                                                                                                           |                                                                                                                                                                                                                                                                                                                                                                           |
|----|-----------------------------------|-----------------------------------------------------------------------------------------------------------------------------------------------------------------------------------------------------------------------------------------------------------------------------------------------------------|---------------------------------------------------------------------------------------------------------------------------------------------------------------------------------------------------------------------------------------------------------------------------------------------------------------------------------------------------------------------------|
| 9  | AI microscope                     | Skin pattern detection for ripeness and other quality features - TBD                                                                                                                                                                                                                                      | Possibility to develop a ripeness index for fruit and vegetables based on image classification                                                                                                                                                                                                                                                                            |
| 10 | Spectrometer for cheese           | Fat protein and fat content detection for consistency of cheese production using a device                                                                                                                                                                                                                 | Ability to measure as part of the processing to act early and ensure consistency of cheese quality                                                                                                                                                                                                                                                                        |
| 11 | Machine learning expert           | Social Network Analysis and Machine Learning as a definition of data types and relationships between different network nodes                                                                                                                                                                              | Flow of data identified for data gathering and flow of quality across multiple operators                                                                                                                                                                                                                                                                                  |
| 12 | Machine learning expert           | Sustainability star rating of produce online based on sustainability credentials and certifications. Framework developed around food                                                                                                                                                                      | Definition of data points required for scoring of sustainable practices or sustainable produce                                                                                                                                                                                                                                                                            |
| 13 | Machine learning expert           | Sustainable farming supply chain. Example with coffee trade other projects where the aim is to improve the life of the farmers. Ensure the price the consumer pays go to the primary producer. Answer the question, as a consumer how can I verify the produce is 100% produced by sustainable practices. | Tracking and tracing of supply chain practices and revenue distribution.                                                                                                                                                                                                                                                                                                  |
| 14 | Victorian inventor                | Two spectrometer-based readers for assessment of nutrient density and comparison to good value price for money                                                                                                                                                                                            | Score for vegetables and fruit. (a similar technology exists which gives the following details of what data is created: "This captures a large set of measurements about the fruit and its environment, revealing data like the fruit's sugar content, acidity, firmness, weight and color, as well as its GPS location and weather conditions at the time of sampling.") |
| 15 | AI and Image recognition for beef | Possibility to look at using machine vision to detect fat content, marbling and colour and indications of quality                                                                                                                                                                                         | Image classification to rate the quality of beef either at the producer or at the consumer level                                                                                                                                                                                                                                                                          |

|    |                                                                   |                                                                                          |                                                                                                                         |
|----|-------------------------------------------------------------------|------------------------------------------------------------------------------------------|-------------------------------------------------------------------------------------------------------------------------|
| 16 | AI and image recognition for shelf life                           | Possibility to look at measuring shelf life of produce                                   | Data comparison using vegetable and fruit types and appearance over a period of time, within uncontrolled storage types |
| 17 | Digital Agriculture Services + (software developer/beef producer) | Add the ability to input on farm info on fertiliser / seeding / weed reduction programs. | Ability to compare soil health and farm data with the type of inputs.                                                   |
