# Supplementary figures and images for: Engaging with Artificial Intelligence (AI) with a Bottom-Up Approach for the Purpose of Sustainability: Victorian Farmers Market Association, Melbourne Australia
Source: MDPI journal article supplement (doi:10.3390/su13169314), 2021-08-19

## Supplementary Material SM1 – Strategy Blueprint – Stage B

# Strategy Blueprint

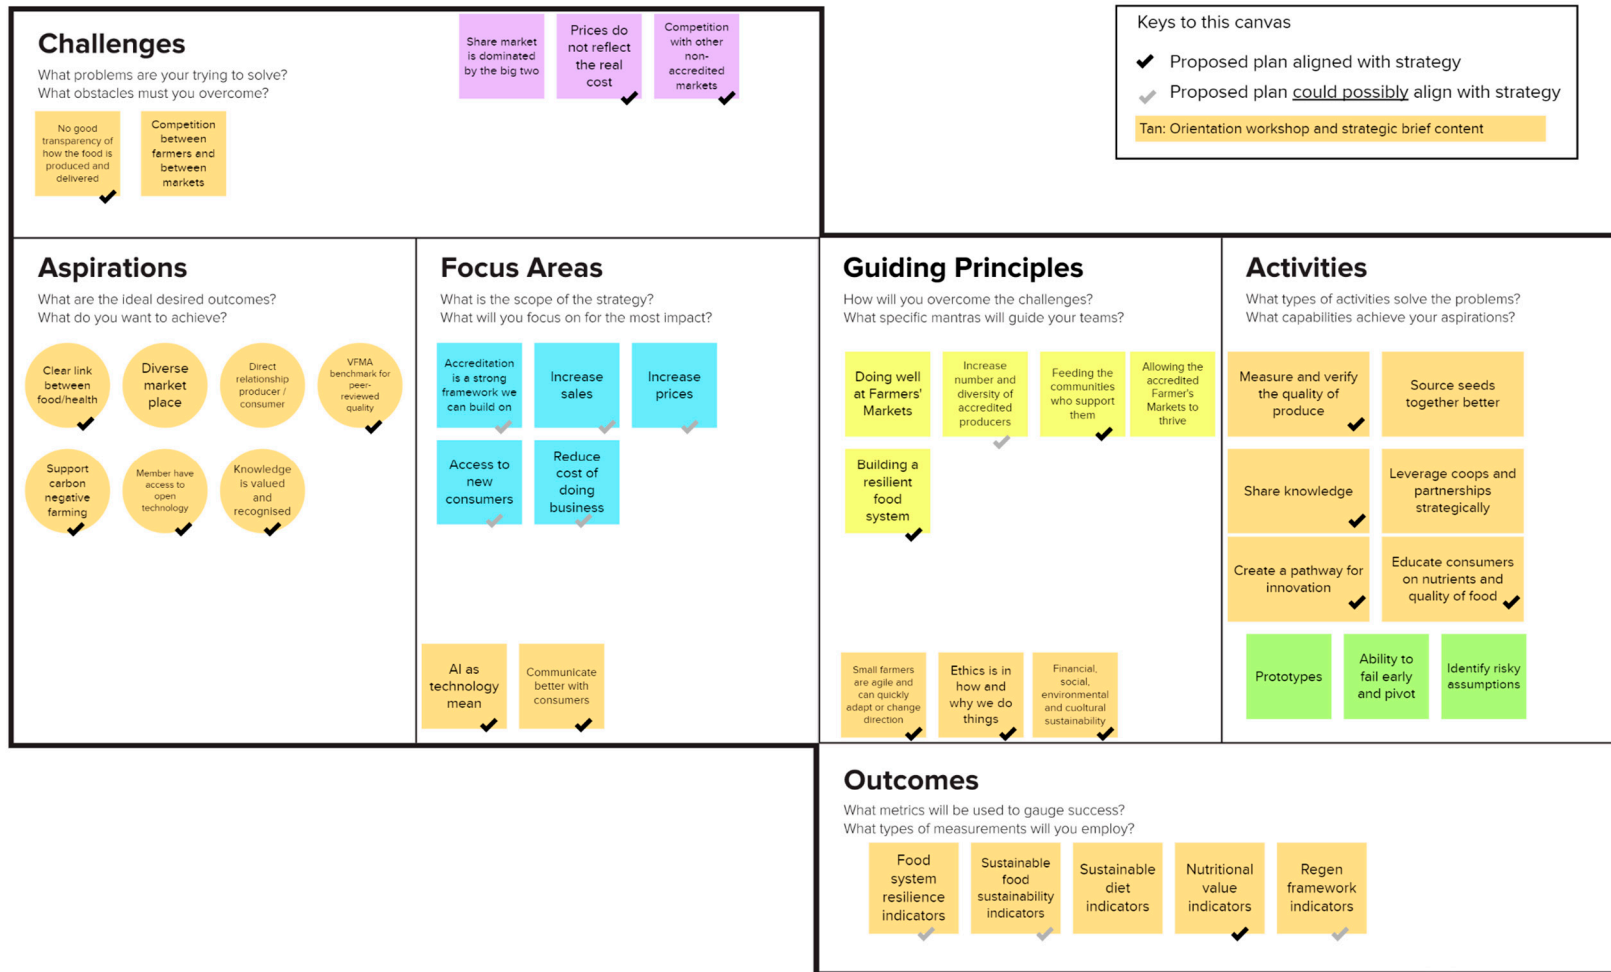

Supplement: s1 [file s1]
